# Supplementary material
Source: publisher site journal article supplement (https://www.dovepress.com/article/584439)

Supplementary Table 1: Distribution of sepsis onset times from the index time (T0; first CIN onset)

| Time（Days） | Sepsis numerical |
| --- | --- |
| 0-3 | 7/48(14.6%) |
| 3-7 | 17/48(35.4%) |
| 7-10 | 20/48(41.7%) |
| >10 | 4/48(8.3%) |

Supplementary Table 2. Distribution of pathogens isolated from positive blood cultures among sepsis cases during the CIN window.

| Pathogen | Isolates (n = 31) | Proportion (%) |
| --- | --- | --- |
| **Gram-negative bacteria** | 18 | 58.1 |
| Escherichia coli | 11 |  |
| Pseudomonas aeruginosa | 7 |  |
| **Gram-positive bacteria** | 10 | 32.3 |
| Viridans streptococci | 3 |  |
| Enterococcus spp | 4 |  |
| Staphylococcus aureus | 3 |  |
| **Fungi** | 3 | 9.6 |
| Candida albicans | 3 |  |

Supplementary Table 3: VIFs for variables after excluding CRP to address multicollinearity

| Variable | VIF | 1/VIF |
| --- | --- | --- |
| CAR | 1.02 | 0.96 |
| RDW | 1.12 | 0.79 |
| PLT | 1.05 | 0.90 |
| PCT | 1.08 | 0.85 |
| IL6 | 1.16 | 0.75 |
| Oral mucosal status | 1.10 | 0.82 |
| Risk stratification | 1.07 | 0.75 |

Abbreviations: CAR, C-reactive protein/albumin ratio; PCT, procalcitonin; RDW, red blood cell distribution width; PLT, platelet;

Supplementary Figure 1: Missing data assessment for variables included in the analyses.
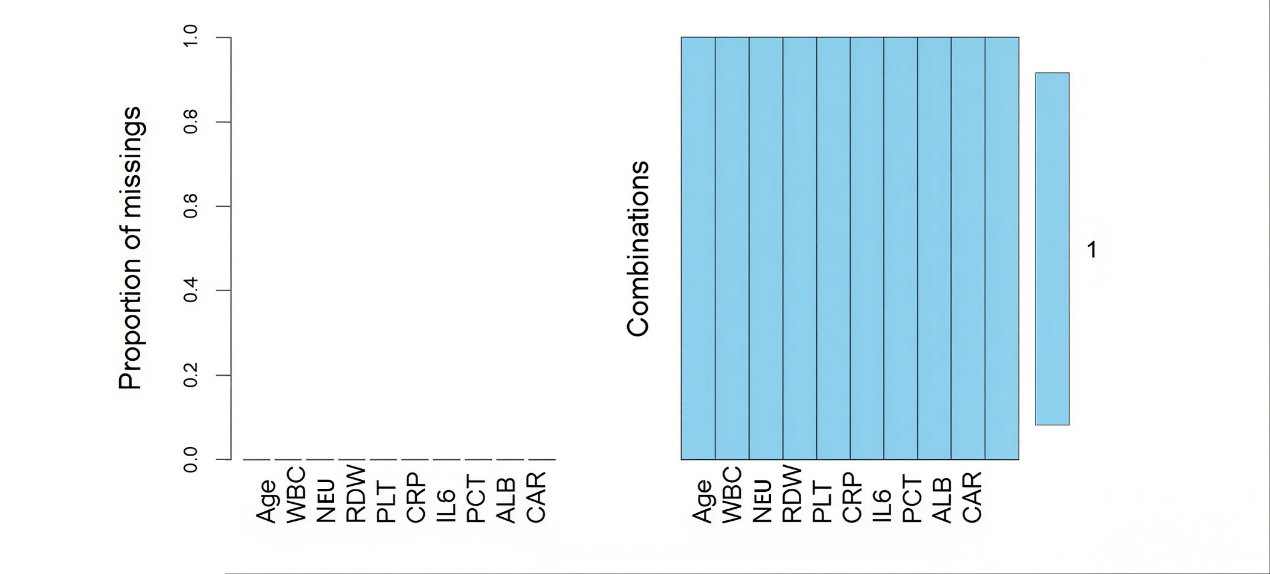

Supplement: Supplementary file 1 [file 584439%20Supplementary%20Material.docx]
